# Supplementary material for: Photoelectron velocity-map imaging spectroscopy of nickel carbide: examination of the low-lying electronic states
Source: Royal Society of Chemistry journal article supplement (doi:10.1039/d2nj01564a), 2022-01-01
Supplement: d2nj01564a1.pdf [file d2nj01564a1.pdf]

# **Photoelectron velocity-map imaging spectroscopy of nickel carbide: Examination of the low-lying electronic states**

Zhiling Liu,<sup>\*,1</sup> Qingyang Lin,<sup>1</sup> Ya Li,<sup>1</sup> Jing He,<sup>1</sup> Jingmei Jiao,<sup>1</sup> Lianxia Liu,<sup>1</sup>

Yonghong Yan,<sup>1</sup> Hai-Shun Wu,<sup>1</sup> Fuqiang Zhang,<sup>1</sup> Jianfeng Jia,<sup>1</sup> and Hua Xie<sup>\*,2</sup>

*<sup>1</sup>School of Chemical and Material Science, Key Laboratory of Magnetic Molecules & Magnetic Information Materials, the Ministry of Education, Shanxi Normal University. No. 339, Taiyu Road, Taiyuan, Shanxi 030031, China.*

*Electronic mail: lzling@sxnu.edu.cn.*

*<sup>2</sup>State Key Laboratory of Molecular Reaction Dynamics, Dalian Institute of Chemical Physics, Chinese Academy of Sciences, 457 Zhongshan Road, Dalian, Liaoning 116023, China.*

*Electronic mail: xiehua@dicp.ac.cn.*

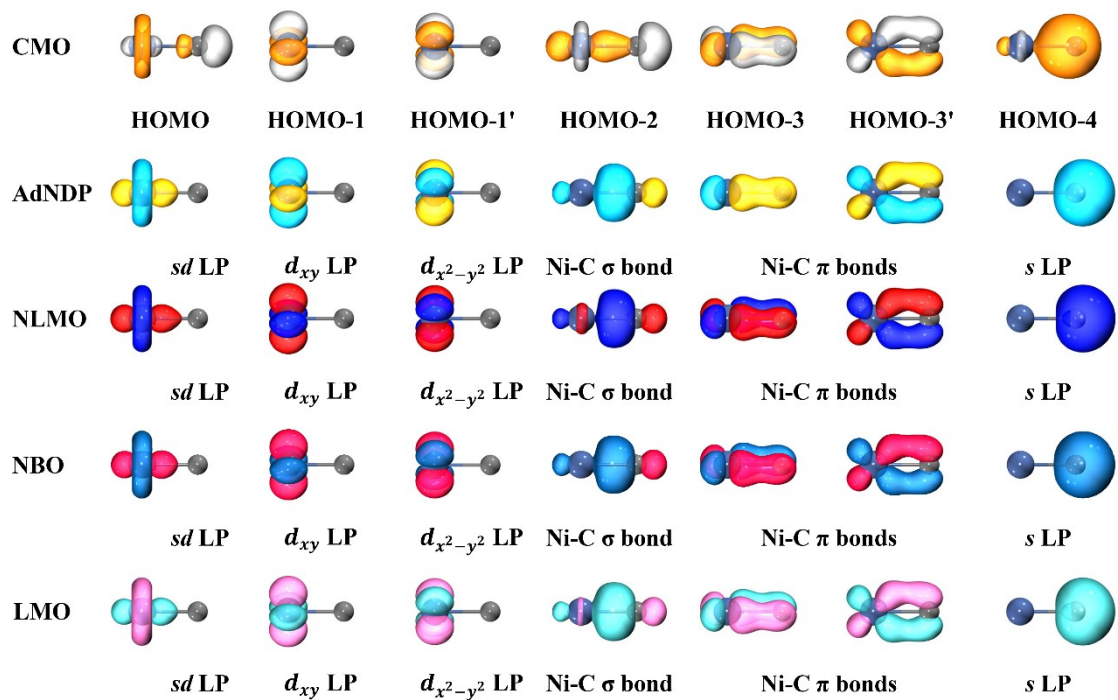

**FIG. S1.** A comparison of selected CMOs, AdNDP, NLMO, NBO, LMO for the NiC molecule calculated at the BP86-D3(BJ)/def2-TZVPP level. (isosurface = 0.1 au)

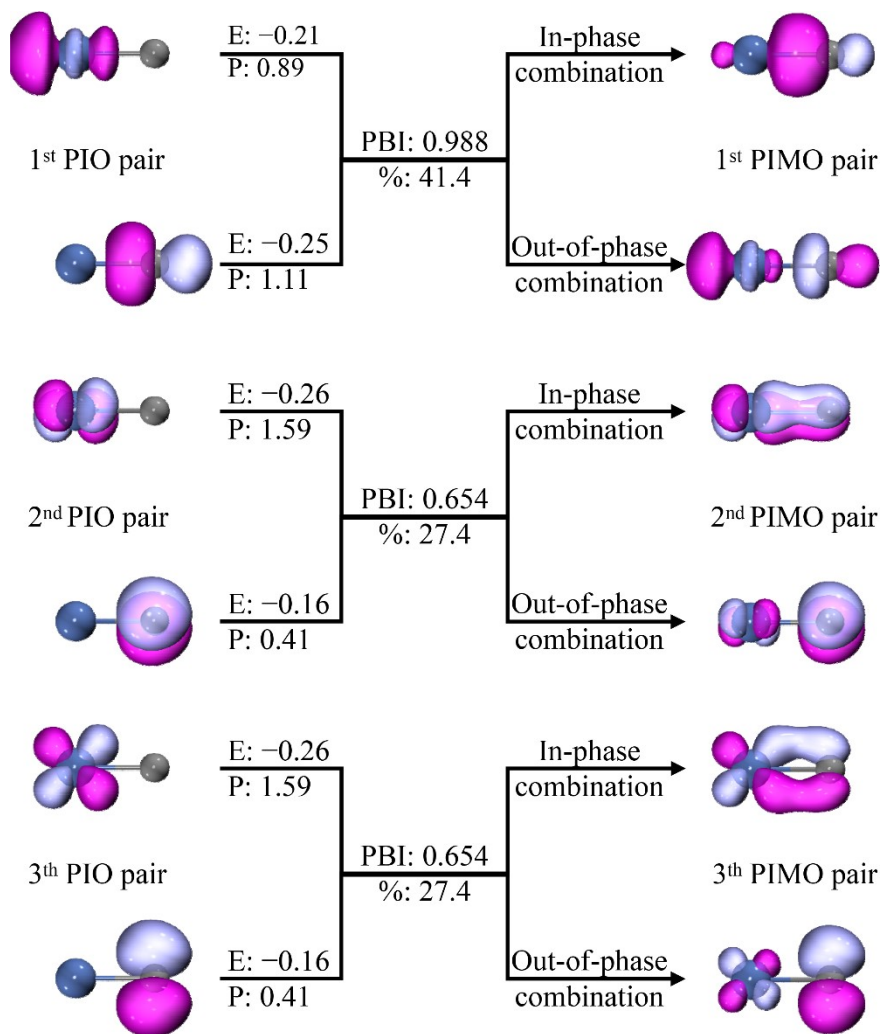

**FIG. S2.** Results of PIO analysis on NiC with Ni atom and C atom as two fragments at the BP86-D3(BJ)/def2-TZVPP level. (isosurface = 0.1 au)

**TABLE S1.** EDA-NOCV results for NiC at the BP86-D3(BJ)/TZ2P level using charged nickel ion and carbon ion in different electronic reference configuration as interacting moieties. Energy values are given in kcal·mol<sup>-1</sup>.

| Fragments                                  | C <sup>+</sup> [ <i>D</i> , (2 <i>s</i> <sub>σ</sub> ) <sup>2</sup> (2 <i>p</i> <sub>π</sub> ) <sup>0</sup> (2 <i>p</i> <sub>σ</sub> ) <sup>1</sup> ]                                          | C <sup>-</sup> [ <i>Q</i> , (2 <i>s</i> <sub>σ</sub> ) <sup>2</sup> (2 <i>p</i> <sub>π</sub> ) <sup>2</sup> (2 <i>p</i> <sub>σ</sub> ) <sup>1</sup> ]                                          | C <sup>-</sup> [ <i>D</i> , (2 <i>s</i> <sub>σ</sub> ) <sup>2</sup> (2 <i>p</i> <sub>π</sub> ) <sup>3</sup> (2 <i>p</i> <sub>σ</sub> ) <sup>0</sup> ]                                          | C <sup>-</sup> [ <i>D</i> , (2 <i>s</i> <sub>σ</sub> ) <sup>2</sup> (2 <i>p</i> <sub>π</sub> ) <sup>1</sup> (2 <i>p</i> <sub>σ</sub> ) <sup>2</sup> ]                                          |
|--------------------------------------------|------------------------------------------------------------------------------------------------------------------------------------------------------------------------------------------------|------------------------------------------------------------------------------------------------------------------------------------------------------------------------------------------------|------------------------------------------------------------------------------------------------------------------------------------------------------------------------------------------------|------------------------------------------------------------------------------------------------------------------------------------------------------------------------------------------------|
|                                            | Ni <sup>-</sup> [ <i>D</i> , (3 <i>d</i> <sub>π</sub> ) <sup>4</sup> (3 <i>d</i> <sub>σ</sub> ) <sup>2</sup> (3 <i>d</i> <sub>δ</sub> ) <sup>4</sup> (4 <i>s</i> <sub>σ</sub> ) <sup>1</sup> ] | Ni <sup>+</sup> [ <i>Q</i> , (3 <i>d</i> <sub>π</sub> ) <sup>2</sup> (3 <i>d</i> <sub>σ</sub> ) <sup>2</sup> (3 <i>d</i> <sub>δ</sub> ) <sup>4</sup> (4 <i>s</i> <sub>σ</sub> ) <sup>1</sup> ] | Ni <sup>+</sup> [ <i>D</i> , (3 <i>d</i> <sub>π</sub> ) <sup>1</sup> (3 <i>d</i> <sub>σ</sub> ) <sup>2</sup> (3 <i>d</i> <sub>δ</sub> ) <sup>4</sup> (4 <i>s</i> <sub>σ</sub> ) <sup>2</sup> ] | Ni <sup>+</sup> [ <i>D</i> , (3 <i>d</i> <sub>π</sub> ) <sup>3</sup> (3 <i>d</i> <sub>σ</sub> ) <sup>2</sup> (3 <i>d</i> <sub>δ</sub> ) <sup>4</sup> (4 <i>s</i> <sub>σ</sub> ) <sup>0</sup> ] |
| Symmetry                                   | <i>C</i> <sub>∞v</sub>                                                                                                                                                                         | <i>C</i> <sub>∞v</sub>                                                                                                                                                                         | <i>C</i> <sub>2v</sub>                                                                                                                                                                         | <i>C</i> <sub>2v</sub>                                                                                                                                                                         |
| Δ <i>E</i> <sub>int</sub>                  | -432.12                                                                                                                                                                                        | -303.90                                                                                                                                                                                        | -559.88                                                                                                                                                                                        | -414.52                                                                                                                                                                                        |
| Δ <i>E</i> <sub>pauli</sub>                | 271.92                                                                                                                                                                                         | 331.01                                                                                                                                                                                         | 236.59                                                                                                                                                                                         | 324.86                                                                                                                                                                                         |
| Δ <i>E</i> <sub>disp</sub> <sup>a</sup>    | -1.19 (0.17%)                                                                                                                                                                                  | -1.19 (0.19%)                                                                                                                                                                                  | -1.19 (0.15%)                                                                                                                                                                                  | -1.19 (0.16%)                                                                                                                                                                                  |
| Δ <i>E</i> <sub>elstat</sub> <sup>a</sup>  | -311.89 (43.30%)                                                                                                                                                                               | -391.47 (61.66%)                                                                                                                                                                               | -230.74 (28.97%)                                                                                                                                                                               | -393.66 (53.24%)                                                                                                                                                                               |
| Δ <i>E</i> <sub>orb</sub> <sup>a</sup>     | -390.95 (55.53%)                                                                                                                                                                               | -242.25 (38.16%)                                                                                                                                                                               | -564.54 (70.88%)                                                                                                                                                                               | -344.54 (46.60%)                                                                                                                                                                               |
| Δ <i>E</i> <sub>orb(σ)</sub> <sup>b</sup>  | -129.30 (33.07%)                                                                                                                                                                               | -64.61 (26.67%)                                                                                                                                                                                | -344.50 (61.02%)                                                                                                                                                                               | -69.18 (20.08%)                                                                                                                                                                                |
| Δ <i>E</i> <sub>orb(π)</sub> <sup>b</sup>  | -120.75 (30.89%)                                                                                                                                                                               | -80.12 (33.07%)                                                                                                                                                                                | -100.15 (17.74%)                                                                                                                                                                               | -234.46 (68.05%)                                                                                                                                                                               |
| Δ <i>E</i> <sub>orb(π')</sub> <sup>b</sup> | -120.75 (30.89%)                                                                                                                                                                               | -80.12 (33.07%)                                                                                                                                                                                | -119.65 (21.19%)                                                                                                                                                                               | -23.92 (6.94%)                                                                                                                                                                                 |

<sup>a</sup>The italic capital letters *D* and *Q* in square brackets stand for the electronic doublet and quartet states, respectively.

<sup>b</sup>The value in parentheses gives the percentage contribution to the total attractive interactions Δ*E*<sub>disp</sub> + Δ*E*<sub>elstat</sub> + Δ*E*<sub>orb</sub>.

<sup>c</sup>The value in parentheses gives the percentage contribution to the total orbital interactions Δ*E*<sub>orb</sub>.
